# Supplementary material for: Comparative genomic and functional analyses of four sequenced Bacillus cereus genomes reveal conservation of genes relevant to plant-growth-promoting traits
Source: PubMed Central journal article supplement (PMC6242881; doi:10.1038/s41598-018-35300-y), 2018-11-19

**Comparative genomic and functional analyses of four sequenced *Bacillus cereus* genomes reveal conservation of genes relevant to plant-growth-promoting traits**

Qingchao Zeng<sup>1</sup>, Jianbo Xie<sup>2</sup>, Yan Li<sup>1</sup>, Tantan Gao<sup>1</sup>, Cheng Xu<sup>1</sup> and Qi Wang<sup>1,\*</sup>

<sup>1</sup>Key Laboratory of Plant Pathology, Ministry of Agriculture, College of Plant Protection, China Agricultural University, Beijing, 100193, P. R. China.

<sup>2</sup>Key Laboratory of Genetics and Breeding in Forest Trees and Ornamental Plants, Ministry of Education, College of Biological Sciences and Technology, Beijing Forestry University, Beijing, 100083, P. R. China.

Table S1 The average nucleotide identity (ANI) values amongst different strains of *Bacillus*. The ANI based on whole-genome comparison of strain 905 with those of other *Bacillus* strains.

|          | BSD-2 | 905   | WP8   | UW85  | CAU<br>B946 | FZB42 | INR7  | XF-1  | AR156 | CC178 | SG-6  | LCR12 | BSn5  | BAB-1 | SQR9  | UCMB5113 | HJ5   | UCMB5036 |  |
|----------|-------|-------|-------|-------|-------------|-------|-------|-------|-------|-------|-------|-------|-------|-------|-------|----------|-------|----------|--|
| BSD-2    | ---   |       |       |       |             |       |       |       |       |       |       |       |       |       |       |          |       |          |  |
| 905      | 83.86 | ---   |       |       |             |       |       |       |       |       |       |       |       |       |       |          |       |          |  |
| WP8      | 84.9  | 85.57 | ---   |       |             |       |       |       |       |       |       |       |       |       |       |          |       |          |  |
| UW85     | 82.41 | 96.47 | 84.42 | ---   |             |       |       |       |       |       |       |       |       |       |       |          |       |          |  |
| CAU B946 | 84.48 | 86.18 | 85.57 | 87.44 | ---         |       |       |       |       |       |       |       |       |       |       |          |       |          |  |
| FZB42    | 84.52 | 85.57 | 85.66 | 87.95 | 97.76       | ---   |       |       |       |       |       |       |       |       |       |          |       |          |  |
| INR7     | 85.04 | 85.03 | 88.98 | 86.6  | 84.92       | 84.86 | ---   |       |       |       |       |       |       |       |       |          |       |          |  |
| XF-1     | 99.92 | 84.26 | 85.03 | 86.03 | 84.47       | 84.53 | 85.3  | ---   |       |       |       |       |       |       |       |          |       |          |  |
| AR156    | 83.51 | 92.22 | 85.39 | 92.14 | 84.71       | 84.68 | 85.88 | 83.43 | ---   |       |       |       |       |       |       |          |       |          |  |
| CC178    | 84.52 | 85.52 | 85.63 | 87.98 | 97.76       | 99.98 | 84.9  | 84.53 | 84.71 | ---   |       |       |       |       |       |          |       |          |  |
| SG-6     | 98.34 | 84.16 | 84.77 | 86.71 | 84.3        | 84.39 | 84.68 | 98.28 | 83.95 | 84.36 | ---   |       |       |       |       |          |       |          |  |
| LCR12    | 83.73 | 96.87 | 85.76 | 96.3  | 85.08       | 85.15 | 85.41 | 83.81 | 92.11 | 85.15 | 84.44 | ---   |       |       |       |          |       |          |  |
| BSn5     | 98.32 | 84    | 84.44 | 86.08 | 84.26       | 84.26 | 84.69 | 98.26 | 83.4  | 84.32 | 98.75 | 85.25 | ---   |       |       |          |       |          |  |
| BAB-1    | 99.95 | 83.69 | 84.73 | 85.68 | 84.07       | 84.32 | 84.94 | 99.9  | 83.44 | 84.28 | 98.33 | 84.94 | 98.29 | ---   |       |          |       |          |  |
| SQR9     | 84.42 | 86.48 | 85.64 | 88.14 | 97.68       | 98.48 | 84.73 | 84.62 | 84.89 | 98.48 | 84.28 | 86.62 | 84.44 | 84.26 | ---   |          |       |          |  |
| UCMB5113 | 84.52 | 86.43 | 85.66 | 88.09 | 97.83       | 98.87 | 84.95 | 84.51 | 84.95 | 98.88 | 84.37 | 86.35 | 84.29 | 84.3  | 98.46 | ---      |       |          |  |
| HJ5      | 99.98 | 83.79 | 85.02 | 85.4  | 84.29       | 84.38 | 85.22 | 99.92 | 83.42 | 84.37 | 98.34 | 84.95 | 98.32 | 99.95 | 84.5  | 84.36    | ---   |          |  |
| UCMB5036 | 84.57 | 86.72 | 85.48 | 88.58 | 97.79       | 98.87 | 84.82 | 84.7  | 84.65 | 98.86 | 84.36 | 86.13 | 84.4  | 84.34 | 98.33 | 99.32    | 84.44 | ---      |  |

Table S2 Comparative analysis of the functional categories based on COG of the protein-coding genes of the *B. cereus* strains analyzed.

| <b>Functional categories based on COG (%)</b>                 | <b>905</b> | <b>AR156</b> | <b>LCR12</b> | <b>UW85</b> |
|---------------------------------------------------------------|------------|--------------|--------------|-------------|
| [A]RNA processing and modification                            | 1(0.03)    | 1(0.03)      | 0(0)         | 1(0.03)     |
| [C]Energy production and conversion                           | 202(5.40)  | 203(5.47)    | 203(5.20)    | 200(5.17)   |
| [D]Cell cycle control, cell division, chromosome partitioning | 42(1.12)   | 41(1.11)     | 44(1.13)     | 41(1.06)    |
| [E]Amino acid transport and metabolism                        | 361(9.66)  | 361(9.73)    | 368(9.42)    | 377(9.74)   |
| [F]Nucleotide transport and metabolism                        | 107(2.86)  | 103(2.78)    | 105(2.69)    | 107(2.77)   |
| [G]Carbohydrate transport and metabolism                      | 185(4.95)  | 188(5.07)    | 189(4.84)    | 201(5.20)   |
| [H]Coenzyme transport and metabolism                          | 252(6.74)  | 255(6.87)    | 270(6.91)    | 262(6.77)   |
| [I]Lipid transport and metabolism                             | 92(2.46)   | 99(2.67)     | 105(2.69)    | 96(2.48)    |
| [J]Translation, ribosomal structure and biogenesis            | 212(5.67)  | 211(5.69)    | 212(5.43)    | 207(5.35)   |

|                                                                  |            |            |            |            |
|------------------------------------------------------------------|------------|------------|------------|------------|
| [K]Transcription                                                 | 282(7.54)  | 298(8.03)  | 289(7.40)  | 296(7.65)  |
| [L]Replication, recombination and repair                         | 149(3.99)  | 136(3.67)  | 182(4.66)  | 200(5.17)  |
| [M]Cell wall/membrane/envelope biogenesis                        | 239(6.39)  | 227(6.12)  | 262(6.71)  | 237(6.13)  |
| [N]Cell motility                                                 | 20(0.54)   | 18(0.49)   | 18(0.46)   | 18(0.47)   |
| [O]Posttranslational modification, protein turnover, chaperones  | 128(3.42)  | 126(3.40)  | 131(3.35)  | 136(3.52)  |
| [P]Inorganic ion transport and metabolism                        | 207(5.54)  | 211(5.69)  | 216(5.53)  | 219(5.66)  |
| [Q]Secondary metabolites biosynthesis, transport and catabolism  | 47(1.26)   | 39(1.05)   | 56(1.43)   | 55(1.42)   |
| [R]General function prediction only                              | 476(12.73) | 468(12.61) | 501(12.83) | 485(12.54) |
| [S]Function unknown                                              | 467(12.49) | 452(12.18) | 463(11.85) | 461(11.92) |
| [T]Signal transduction mechanisms                                | 117(3.13)  | 123(3.32)  | 131(3.35)  | 121(3.13)  |
| [U]Intracellular trafficking, secretion, and vesicular transport | 33(0.88)   | 31(0.84)   | 38(0.97)   | 29(0.75)   |
| [V]Defense mechanisms                                            | 119(3.18)  | 119(3.21)  | 123(3.15)  | 120(3.10)  |

---

Table S3 Comparison of the COG assignments between high and low SNP regions. The SNP distribution was calculated throughout the reference *B. cereus* AR156 genome by using a sliding-window size of 5 kb. The top 3% regions were considered high SNP regions, whereas the last 3% regions were considered low SNP regions.

|                                                            | High SNP region | Low SNP region | <i>p</i> -value* |
|------------------------------------------------------------|-----------------|----------------|------------------|
| <b>Information storage and processing</b>                  | <b>14</b>       | <b>20</b>      | 0.02165          |
| Translation, ribosomal structure and biogenesis            | 2               | 14             |                  |
| RNA processing and modification                            | 0               | 0              |                  |
| Transcription                                              | 9               | 3              |                  |
| Replication, recombination and repair                      | 3               | 3              |                  |
| Chromatin structure and dynamics                           | 0               | 0              |                  |
| <b>Cellular processes and signaling</b>                    | <b>30</b>       | <b>26</b>      | 0.2134           |
| Cell cycle control, cell division, chromosome partitioning | 0               | 1              |                  |

|                                                               |           |           |         |
|---------------------------------------------------------------|-----------|-----------|---------|
| Nuclear structure                                             | 0         | 0         |         |
| Defense mechanisms                                            | 7         | 6         |         |
| Signal transduction mechanisms                                | 7         | 2         |         |
| Cell wall/membrane/envelope biogenesis                        | 6         | 12        |         |
| Cell motility                                                 | 0         | 2         |         |
| Cytoskeleton                                                  | 0         | 0         |         |
| Extracellular structures                                      | 0         | 0         |         |
| Intracellular trafficking, secretion, and vesicular transport | 1         | 1         |         |
| Posttranslational modification, protein turnover, chaperones  | 9         | 2         |         |
| <b>Metabolism</b>                                             | <b>46</b> | <b>13</b> | 0.04172 |
| Energy production and conversion                              | 6         | 2         |         |
| Carbohydrate transport and metabolism                         | 4         | 3         |         |

|                                                              |            |           |        |
|--------------------------------------------------------------|------------|-----------|--------|
| Amino acid transport and metabolism                          | 11         | 5         |        |
| Nucleotide transport and metabolism                          | 4          | 0         |        |
| Coenzyme transport and metabolism                            | 13         | 0         |        |
| Lipid transport and metabolism                               | 2          | 1         |        |
| Inorganic ion transport and metabolism                       | 6          | 2         |        |
| Secondary metabolites biosynthesis, transport and catabolism | 0          | 0         |        |
| <b>Poorly characterized</b>                                  | <b>36</b>  | <b>13</b> | 0.2404 |
| General function prediction only                             | 18         | 5         |        |
| Function unknown                                             | 18         | 8         |        |
| <b>Total</b>                                                 | <b>126</b> | <b>72</b> |        |

\*:Fisher's exact test.

Figure S1 Genome map of *Bacillus cereus* 905. Each ring of the circle has a different genome information: rings from the outside in: (1) scale marks (unit: Mb), (2, 3) protein-coding genes on the forward and reverse strands, respectively (color-coded by the functional categories), (4, 5) rRNA (blue) and tRNA (red) on the forward and reverse strands, respectively, (6) GC content (positive: red; negative: blue), and (7) GC skew (above average: aquamarine; below average: orange).



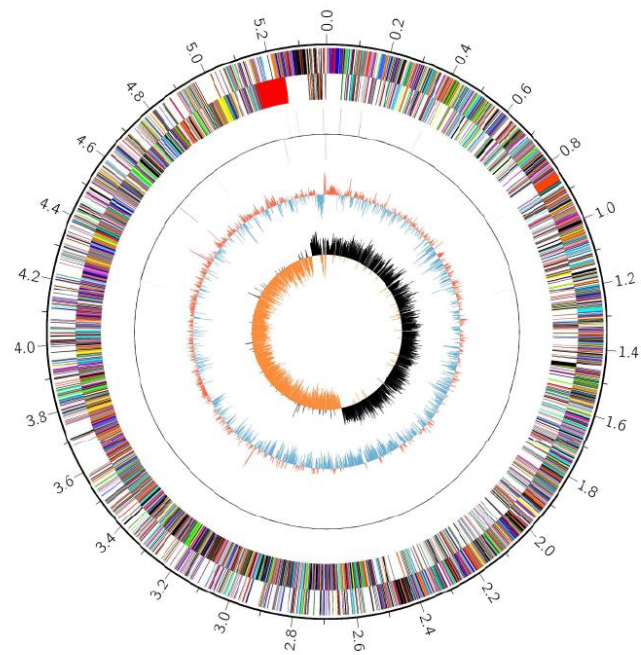

- |                                                                                                  |                                                                                                     |
|--------------------------------------------------------------------------------------------------|-----------------------------------------------------------------------------------------------------|
| <span style="color: yellow;">■</span> Energy production and conversion                           | <span style="color: lightgreen;">■</span> Cell motility                                             |
| <span style="color: orange;">■</span> Cell cycle control, cell division, chromosome partitioning | <span style="color: magenta;">■</span> Posttranslational modification, protein turnover, chaperones |
| <span style="color: cyan;">■</span> Amino acid transport and metabolism                          | <span style="color: blue;">■</span> Inorganic ion transport and metabolism                          |
| <span style="color: blue;">■</span> Nucleotide transport and metabolism                          | <span style="color: orange;">■</span> Secondary metabolites biosynthesis, transport and catabolism  |
| <span style="color: green;">■</span> Carbohydrate transport and metabolism                       | <span style="color: maroon;">■</span> General function prediction only                              |
| <span style="color: purple;">■</span> Coenzyme transport and metabolism                          | <span style="color: orange;">■</span> Function unknown                                              |
| <span style="color: pink;">■</span> Lipid transport and metabolism                               | <span style="color: brown;">■</span> Signal transduction mechanisms                                 |
| <span style="color: blue;">■</span> Translation, ribosomal structure and biogenesis              | <span style="color: yellow;">■</span> Intracellular trafficking, secretion, and vesicular transport |
| <span style="color: red;">■</span> Transcription                                                 | <span style="color: lightblue;">■</span> Defense mechanisms                                         |
| <span style="color: orange;">■</span> Replication, recombination and repair                      | <span style="color: black;">■</span> NO assigned COG                                                |
| <span style="color: grey;">■</span> Cell wall/membrane/envelope biogenesis                       |                                                                                                     |

Figure S2 Phylogenetic tree of 18 *Bacillus* genomes based on the Bayesian inference method. The phylogenetic tree was constructed using 607 single-copy core genes shared by 18 genomes and an out-group (*Paenibacillus polymyxa* M1). The phylogenetic tree was rooted by the out-group. Support values are shown for nodes as bayesian inference posterior probability model bootstrap. Branch lengths were estimated through Bayesian analysis, and the scale bar denotes substitutions per sites.

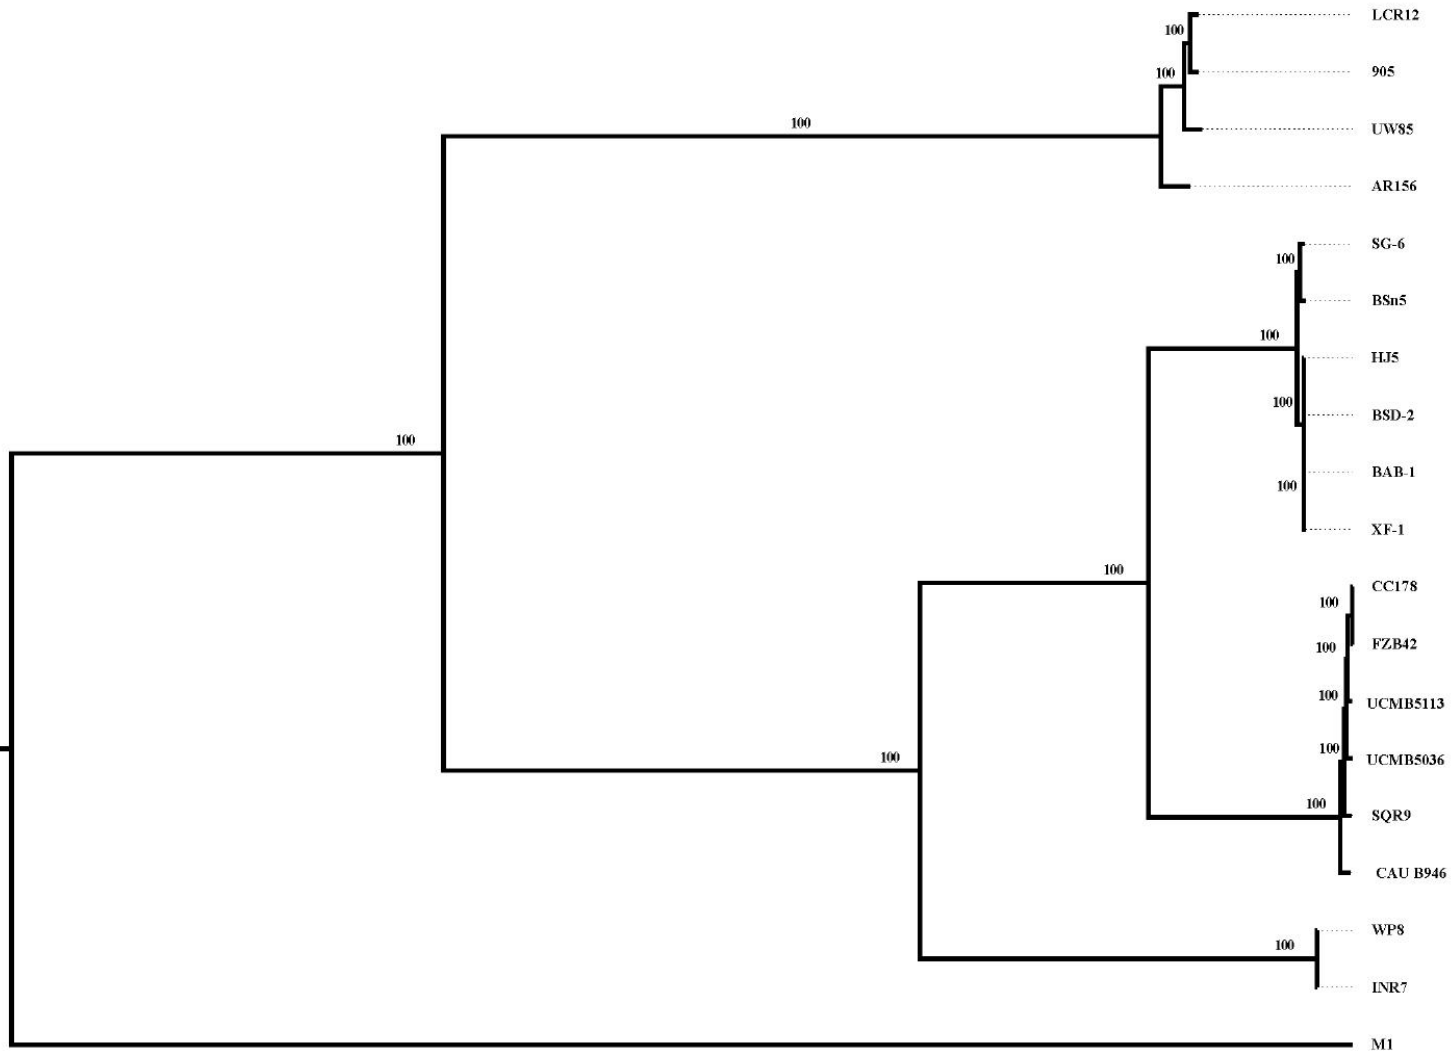

Figure S3 Phylogenetics tree of 18 *Bacillus* genomes based on the Neighbor-Joining method. The phylogenetic tree was constructed using 607 single-copy core genes shared by 18 genomes and an out-group (*P. polymyxa* M1). The phylogenetic tree was rooted by the out-group. Bootstrap values are shown for each node, and the scale bar represents the number of substitutions per site. Branch lengths are proportional to the amount of evolutionary change.

Tree scale: 100

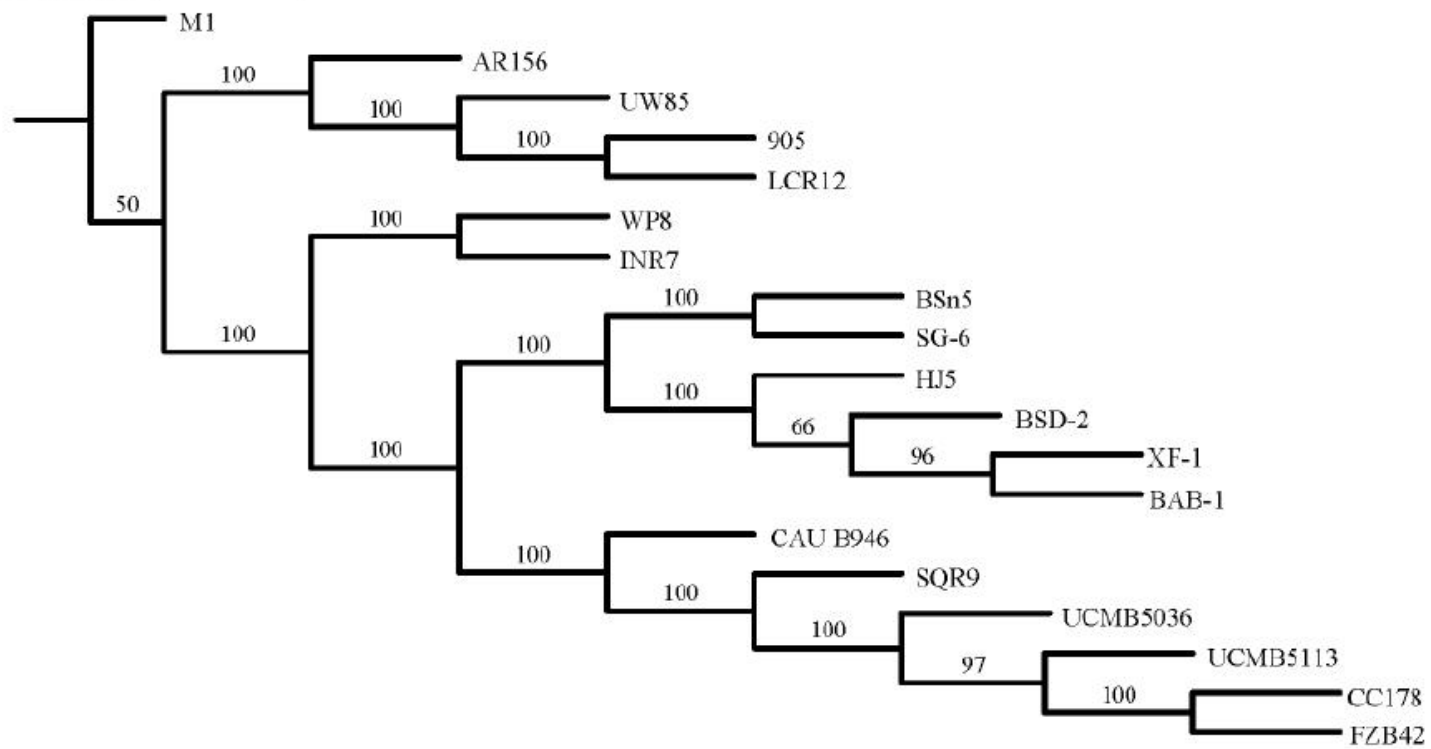

Figure S4 Hierarchical clustering among genomes using the presence/absence of orthologous groups. Approximately unbiased probability and bootstrap probability (au/bp) values were indicated at each node.

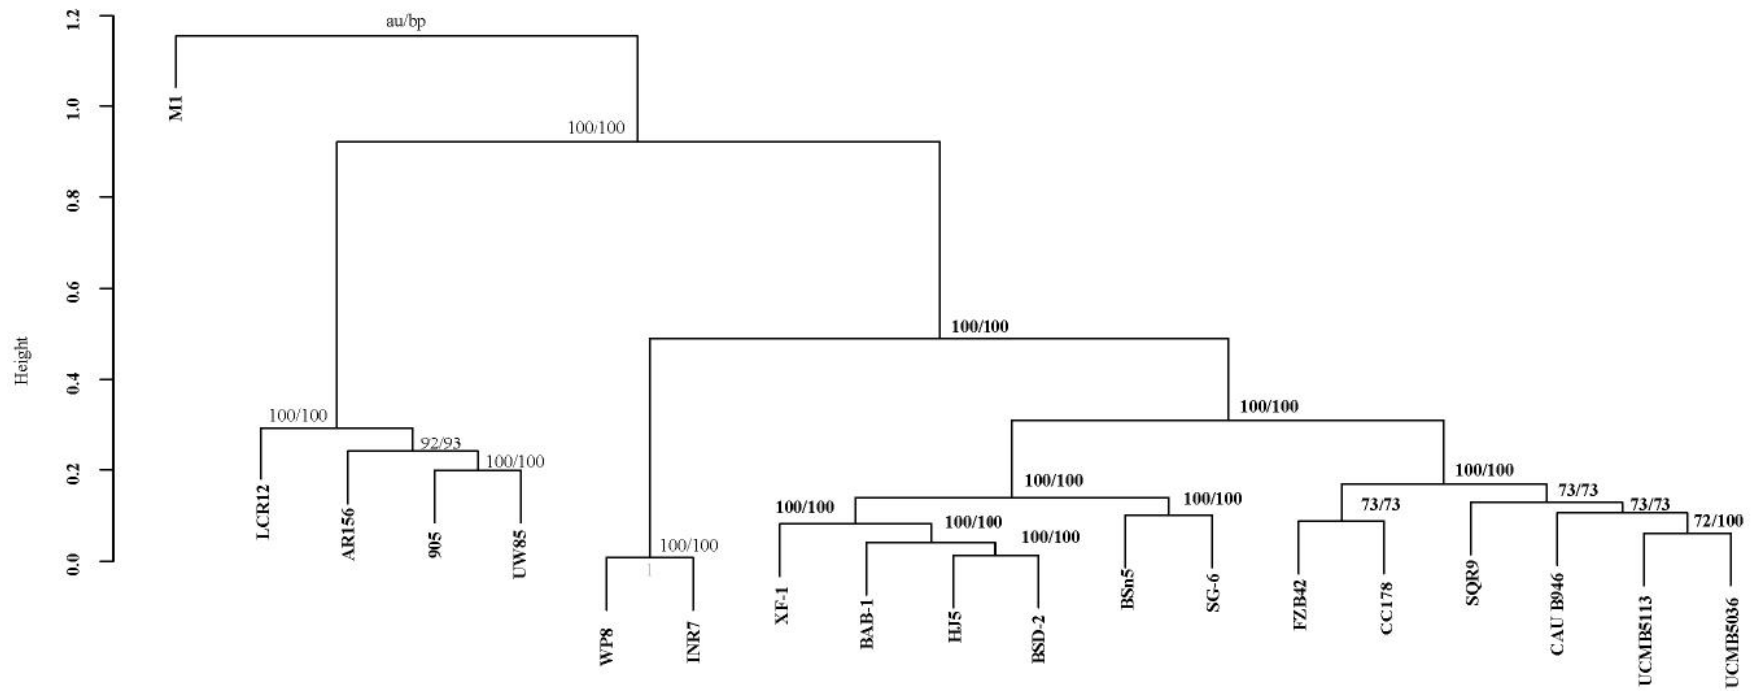

Figure S5 The SNPs and insertion nucleotides in the *B. cereus* 905 genome sequence. The red gene represents the strain-specific gene of *B. cereus* 905. In the genome sequence, the green nucleotide represents the conserved region, and the red nucleotide represents SNP regions. The red box indicates the insertion regions in the genome sequence.

905 AACITAT ..... CACCACAACAGCAGGAGCAACCTTATGTGAATCAAGCTCAACAA TCACAAGCTAGCA .....  
 AR156 AACGTAT ..... CAA ..... CCGCA .....  
 UW85 AACGTAT ..... CACCACAACAGCAAG ..... AACCTTATGTGAATCAAGCTCAACAA TCACAAGCTAGCA .....  
 LCR12 AACGTAT ..... CAA ..... TCACAAGCTAGCA .....

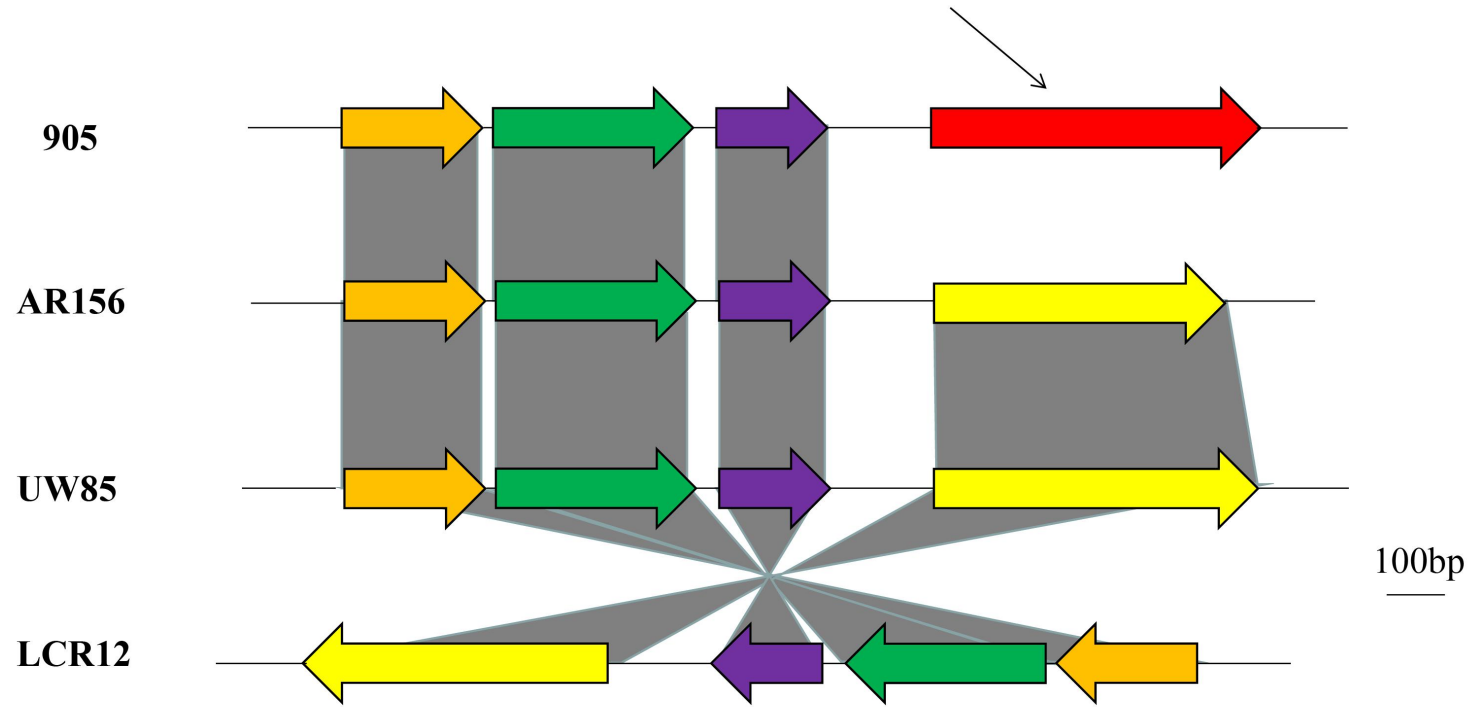

Supplement: 41598_2018_35300_MOESM1_ESM.pdf [file 41598_2018_35300_MOESM1_ESM.pdf]
